# Supplementary material
Source: MDPI journal article supplement (https://www.mdpi.com/1999-4907/13/7/1094)
Supplement: s1 [file s1]

## Article

# Comparative Transcriptome and Pigment Analyses Reveal Changes of Gene Expression Associated with Flavonol Metabolism in Yellow Camellia

**Supplementary Table S1.** Sequences of primers used for the qRT-PCR.

| Target                           | Forward primer (5' to 3') | Reverse primer (5' to 3') |
|----------------------------------|---------------------------|---------------------------|
| <i>GAPDH</i>                     | CTGTCGATGTCTCAGTGGTTGAC   | TGATCTCATCATAGGAAGCCTTCTT |
| <i>c114511.graph_c1(FLS1)</i>    | GGTGGATTTTCGTCGTCGAT      | ACAAGGAGACAACAAGAATGTCATG |
| <i>c132672.graph_c1(FLS2)</i>    | AGGAGAGAGTGCAAGCCATTG     | TTGTTCGATCCTGGCTGTTCA     |
| <i>c136629.graph_c1(GT74D1)</i>  | AATGGCAGAGGCCCTAAAGC      | TGATGTCTCCTCCACGAAACC     |
| <i>c103558.graph_c0(GT83A1)</i>  | CTCCCCATAGGCCCACTTCT      | GATGTTGATCGAGCCATTCCA     |
| <i>c125858.graph_c0(GT86A1)</i>  | CCTTAATCGCCTTCTTCAACGT    | TTGTGCGATAAGAGACCGATCA    |
| <i>c125858.graph_c6(GT86A2)</i>  | TGGGCATAGCTACCGAAGGA      | AACCGGGTTCACCAAAAAGC      |
| <i>c136900.graph_c1(GT72B1)</i>  | CAGCTCCCTCGCCTTTTGT       | CTTGTGTCGTCGTAAGAAATCG    |
| <i>c136900.graph_c2(GT72BL)</i>  | AATAGACCCAACCCCCCTCTT     | GGAGCCCAGCTAAGGATGGT      |
| <i>c114749.graph_c0(GT90)</i>    | TGATTGGTGCCTTTGTTTGC      | CGGAGATGTGATGGAAGTTATGG   |
| <i>c131595.graph_c0(GT8)</i>     | CATGGGTTGGGTGGTGACA       | TCAACCATGGCTTACCTTTGC     |
| <i>c138052.graph_c0(GT90L)</i>   | TGGGCTTGTCATGCAATC        | CGAGCAATGTTACGTTTG        |
| <i>c134185.graph_c1(MYB1R1)</i>  | CCGCCAAATGCCATTCT         | CCATGGTGGTTGGGAAAATT      |
| <i>c140967.graph_c2(MYB3)</i>    | TTCTTTGTGGCCTTTGACCTTT    | CATGCTCCCTCCCTCTCAAG      |
| <i>c140113.graph_c1(ACS1)</i>    | CTAAAGCCAGGAAAACCCATGT    | GCCTCCCCACTTCACTAGCA      |
| <i>c132432.graph_c1(ACS7)</i>    | TGTTTCATGGCTTGTCAGTGT     | GTGGAGGACCGCGTAAAG        |
| <i>c147573.graph_c0(ACS12)</i>   | CAGAAGCAGCCGCAGTTGA       | ACCAGGTCCTGAAGCATTCTG     |
| <i>c95148.graph_c0(ACO1)</i>     | TCATTGTCATGGAGAATCTTAATGG | GCCCCAGAACTCACAAGAATCT    |
| <i>c128783.graph_c0(EIN2)</i>    | ACATTGAAGGCAAGAGCTCCTT    | GCTTGAGCTGAACTGCAAAGTG    |
| <i>c128783.graph_c1(EIN2L)</i>   | AAGCCAAAGCATCAAACAAAGC    | ATGTGGGCAGTAGCACGTCTCT    |
| <i>c140267.graph_c1(EIN3)</i>    | AGTGCAAGCCCCGTGATG        | TCTGATGGCTGCTTCTCTTC      |
| <i>c108582.graph_c1(ERF109)</i>  | GCTCGGATGGGTTCCAAATT      | ACCCAGGACCAGGAGTTCTTC     |
| <i>c127403.graph_c0(ERF109L)</i> | AGTGCCCTTTTTGTCCTCTTGA    | AACGCCCTCTATTCCCAGTTC     |
| <i>c138285.graph_c0(ERF017)</i>  | GCCCGGTGGATCATTTGATA      | TGGGAGAAGCTGACGTCACA      |
| <i>c96422.graph_c1(ERF1b)</i>    | CCCCTCTCCATGCTATACCT      | CTTATGATCAAGCCGCTTTTCG    |

**Supplementary Table S2.** Summary of sequencing reads.

| Sample | Clean Reads | Clean Base (G) | Clean Reads Ratio (%) | Q30 (%) | GC Content (%) | Mapped Ratio (%) |
|--------|-------------|----------------|-----------------------|---------|----------------|------------------|
| CN-1   | 24492072    | 7.32           | 98.50                 | 92.48   | 45.73          | 58.99            |
| CN-2   | 26621922    | 6.97           | 98.66                 | 93.24   | 44.70          | 61.26            |
| CN-3   | 25021699    | 7.49           | 98.68                 | 93.36   | 44.45          | 60.06            |
| ZHQ-1  | 23291183    | 6.97           | 98.87                 | 91.55   | 45.02          | 60.39            |
| ZHQ-2  | 26535549    | 7.94           | 98.92                 | 91.78   | 45.14          | 61.21            |
| ZHQ-3  | 24595056    | 7.36           | 98.87                 | 91.66   | 45.24          | 61.50            |
| HXL-1  | 24476951    | 7.33           | 98.74                 | 93.74   | 45.25          | 59.81            |
| HXL-2  | 243250094   | 6.96           | 98.65                 | 94.23   | 45.04          | 59.71            |
| HXL-3  | 22711885    | 6.79           | 98.89                 | 93.58   | 46.30          | 61.83            |
| XSL-1  | 25784479    | 7.71           | 98.72                 | 91.14   | 45.33          | 58.98            |
| XSL-2  | 24934847    | 7.46           | 98.75                 | 91.17   | 45.11          | 59.33            |
| XSL-3  | 24781860    | 7.41           | 98.69                 | 91.31   | 45.12          | 59.62            |

Supplementary Table S3. Summary of the functional annotation results of unigenes.

| Database  | Annotated number | Annotated percentage (%) |
|-----------|------------------|--------------------------|
| NR        | 38864            | 49.78                    |
| SwissProt | 24308            | 31.14                    |
| GO        | 22950            | 29.40                    |
| COG       | 10907            | 13.97                    |
| KOG       | 21940            | 28.11                    |
| eggNOG    | 36574            | 46.85                    |
| KEGG      | 13792            | 17.67                    |
| Pfam      | 24481            | 31.36                    |
| Overall   | 39886            | 51.09                    |

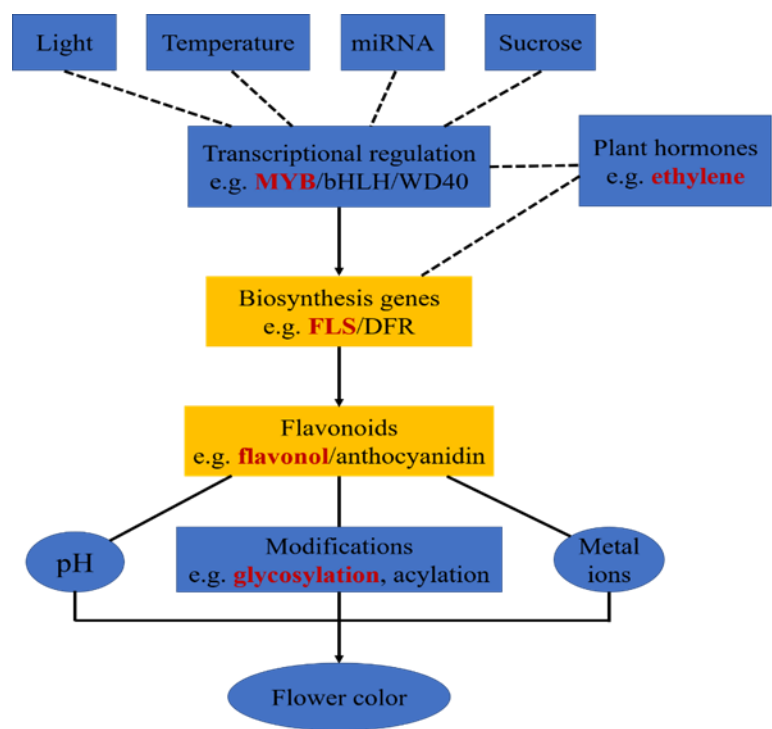

Supplementary Figure S1. Regulation of flower color in plants. In red are those factors related to this article.

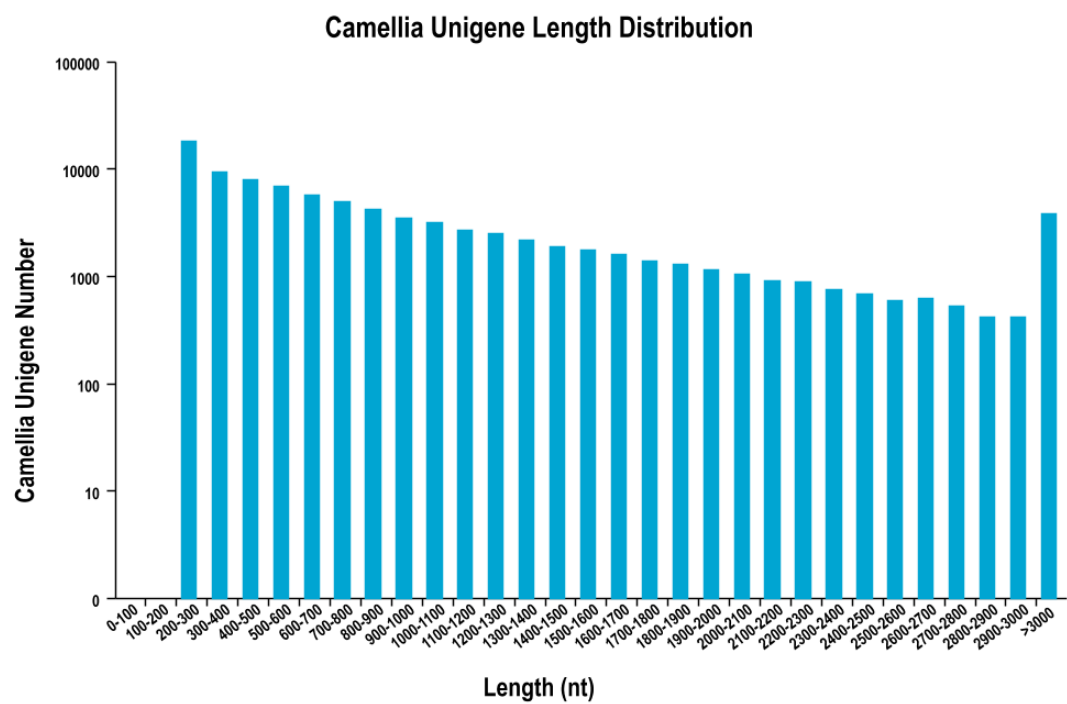

Supplementary Figure S2. Distribution diagram of unigenes.

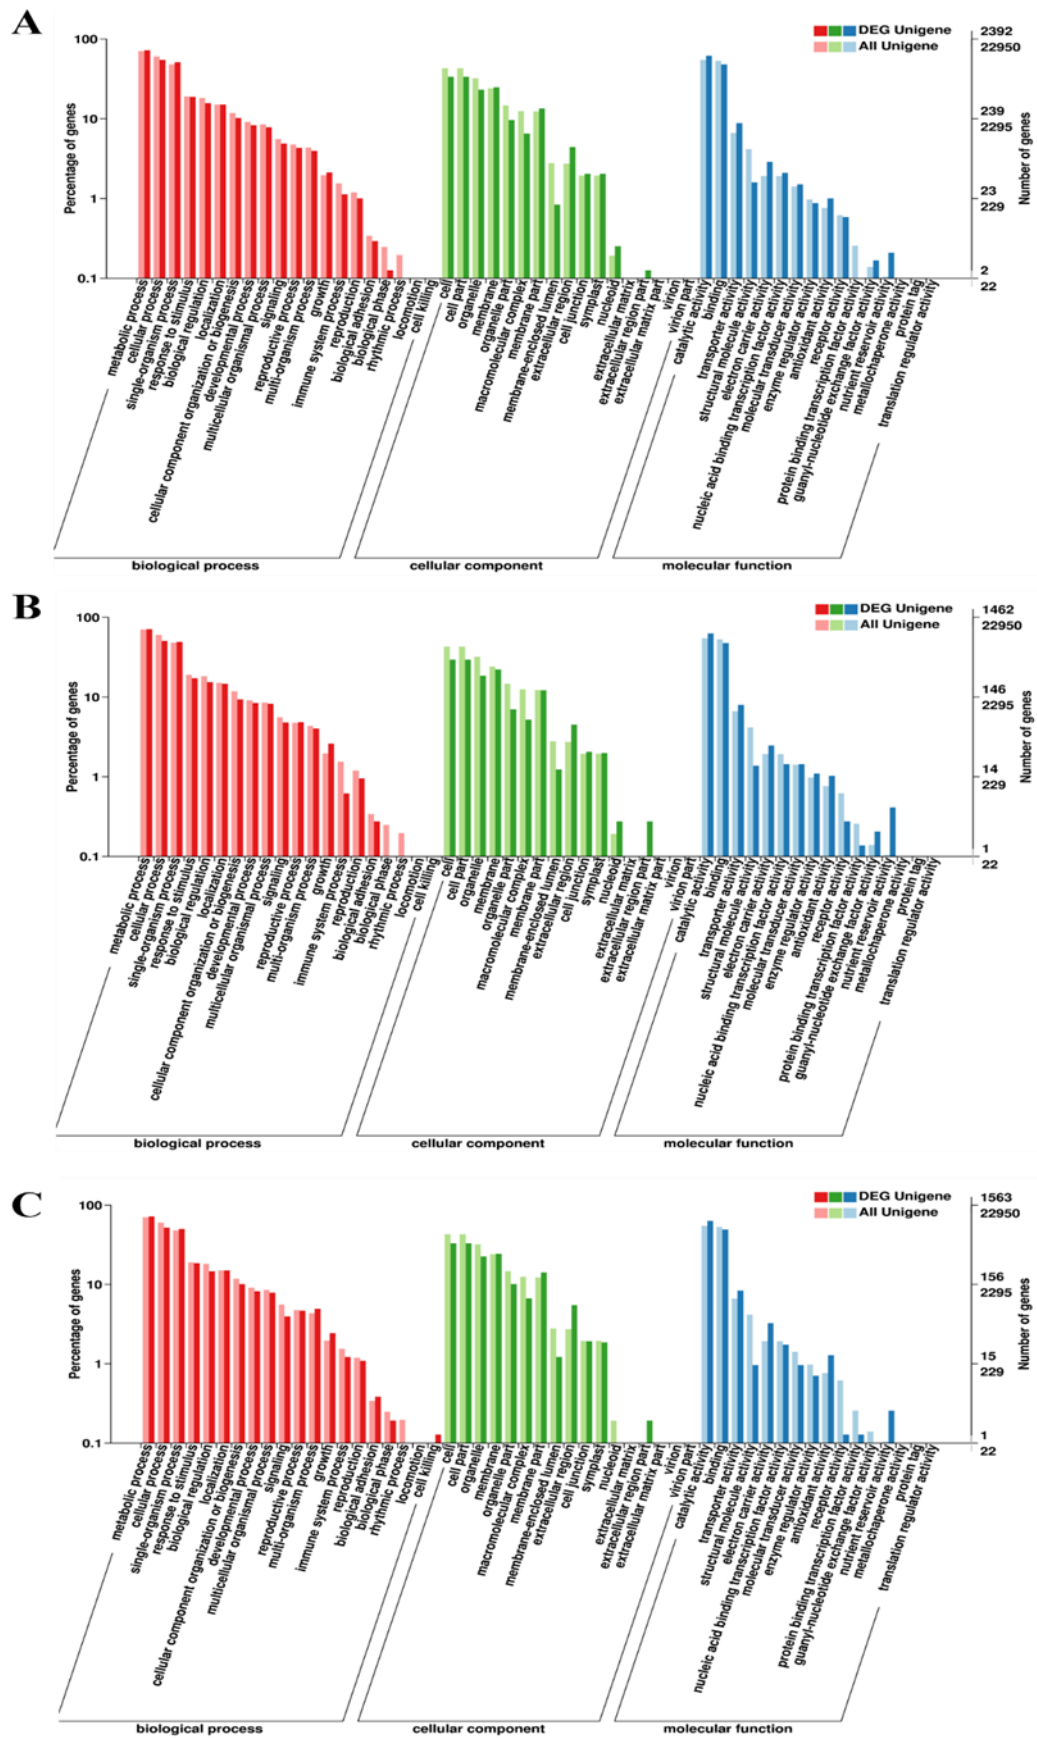

Supplementary Figure S3. Gene ontology (GO) analysis of CN vs ZHQ (A), CN vs HXL (B) and CN vs XSJ (C).

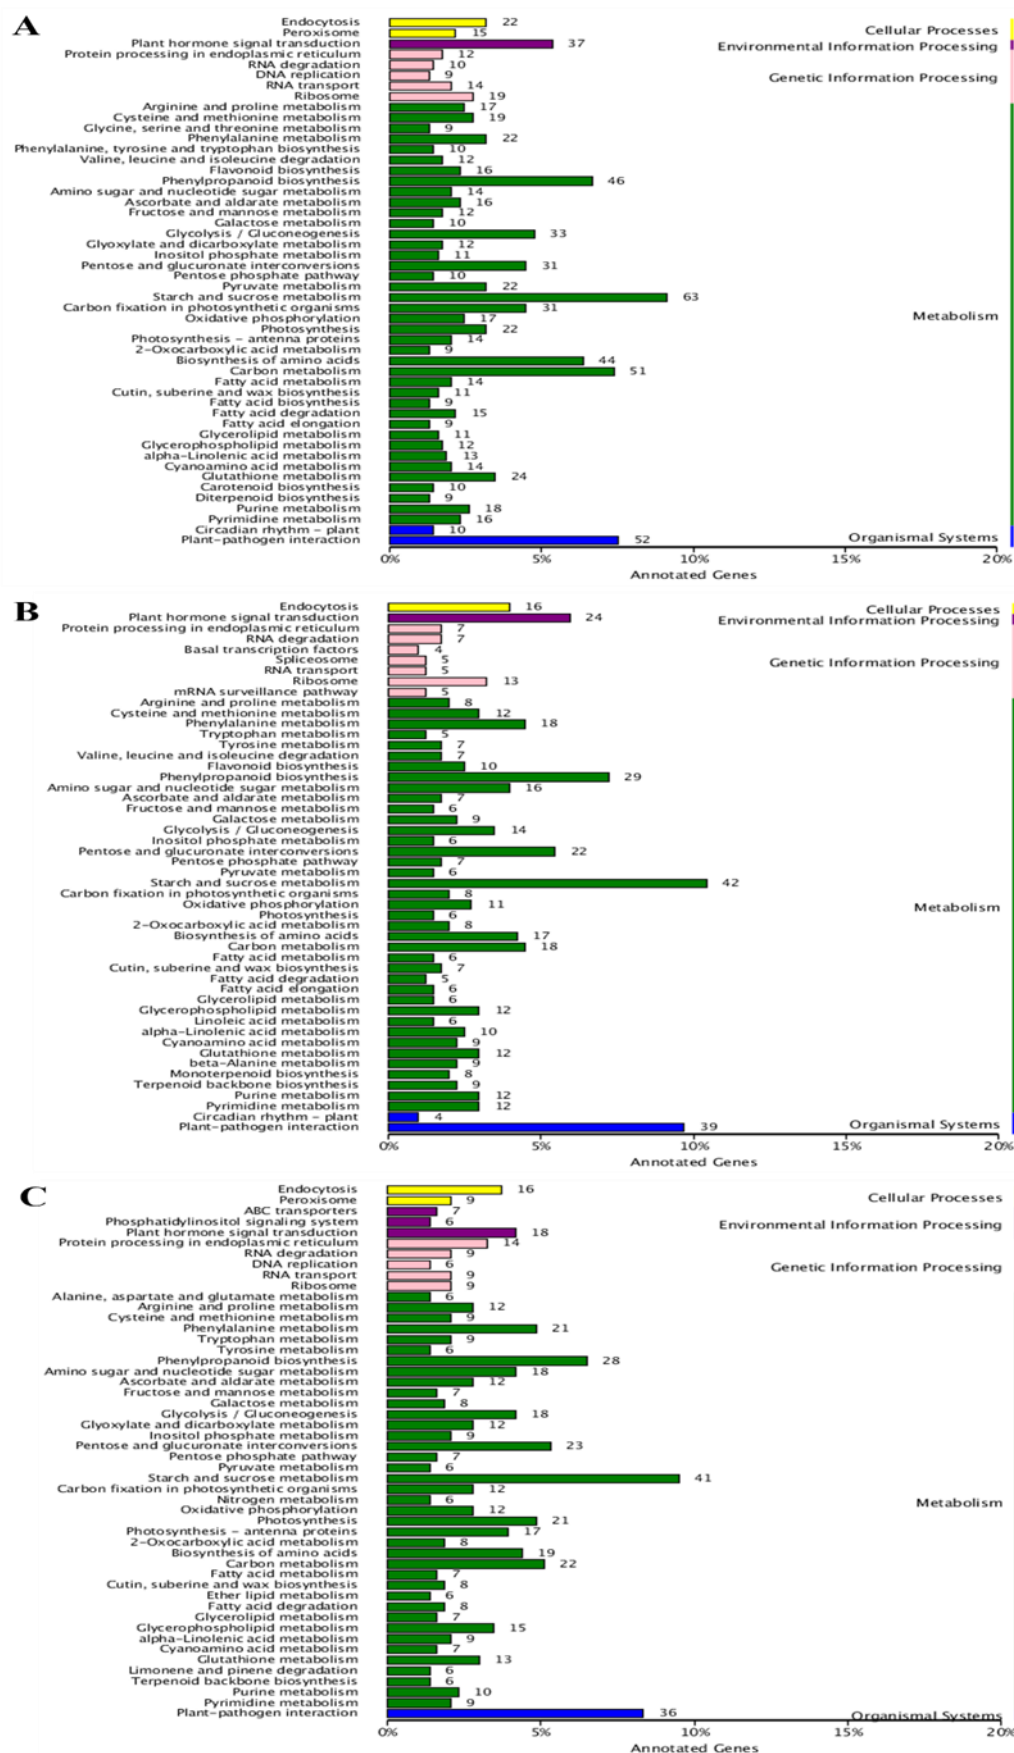

**Supplementary Figure S4.** KEGG and functional enrichment analysis of CN vs ZHQ (A), CN vs HXL (B) and CN vs XSJ (C).
